# Supplementary material for: AgCu NP Formation by the Ag NP Catalysis of Cu Ions at Room Temperature and Their Antibacterial Efficacy: A Kinetic Study
Source: MDPI journal article supplement (doi:10.3390/molecules27206951), 2022-10-17
Supplement: s1 [file s1]

Supplementary Materials

# AgCu NP Formation by the Ag NP Catalysis of Cu Ions at Room Temperature and Their Antibacterial Efficacy: A Kinetic Study

Yujie Tao <sup>1,2</sup>, Fang Zhou <sup>1</sup>, Kaixin Wang <sup>3</sup>, Dequan Yang <sup>1,\*</sup> and Edward Sacher <sup>4</sup>

<sup>1</sup> Solmont Technology Wuxi Co., Ltd., 228 Linghu Blvd, Tian'an Tech Park, A1-602, Xinwu District, Wuxi 214135, China

<sup>2</sup> Division of Natural and Applied Sciences, Duke Kunshan University, Kunshan 215316, China

<sup>3</sup> Hefei Zhonghang Nanotechnology Development Co., Ltd., Gangji Town Industrial Park, Changfeng County, Hefei 231100, China

<sup>4</sup> Regroupement Québécois de Matériaux de Pointe, Département de Génie Physique, Polytechnique Montréal, Case Postale 6079, Succursale Centre-Ville, Montréal, QC H3C 3A7, Canada

\* Correspondence: derry.yang@solmontech.com; Tel.: +86-510-8538-6636

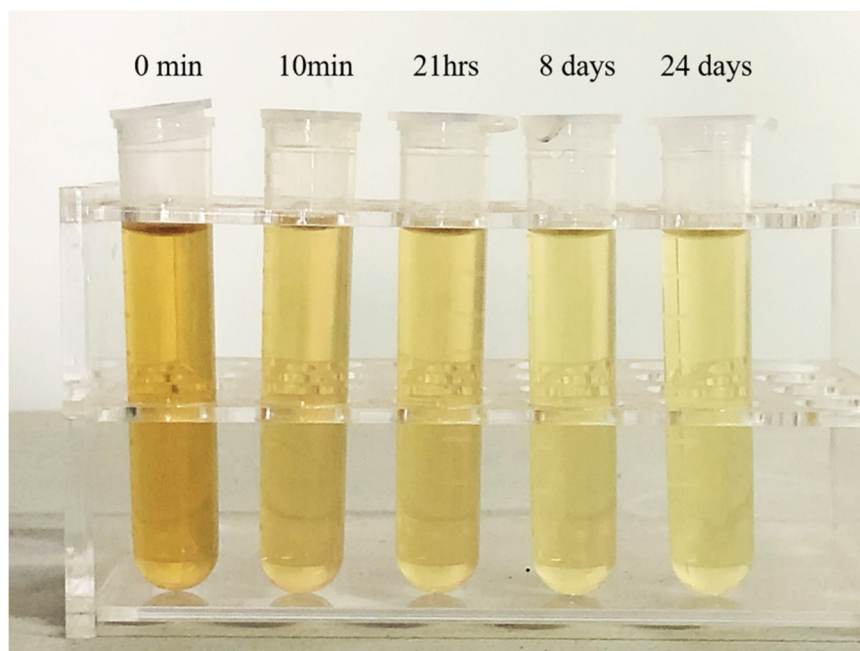

**Figure S1.** The color change of 10 ppm Ag NPs + 100 ppm Cu<sup>2+</sup> over time.

**Table S1.** Zones of Inhibition of samples of Ag NPs+100 ppm Cu<sup>2+</sup>, against two strains at various times (a–e) at room temperature, and at 85 °C (f).

| Samples<br>(10 ppm Ag NPs+100 ppm Cu) | Zone of Inhibition (mm) ± SD (Standard Deviation) |                |
|---------------------------------------|---------------------------------------------------|----------------|
|                                       | <i>S. aureus</i>                                  | <i>E. coli</i> |
| a (0 min, room temperature)           | 7.90 ± 0.15                                       | 8.01 ± 0.12    |
| b (10 min, room temperature)          | 7.90 ± 0.29                                       | 9.92 ± 0.22    |
| c (120 min, room temperature)         | 9.51 ± 0.28                                       | 10.34 ± 0.21   |
| d (24 hrs, room temperature)          | 10.86 ± 0.37                                      | 11.4 ± 0.30    |
| e (38 days, room temperature)         | 12.28 ± 0.61                                      | 14.11 ± 0.07   |
| f (5 hrs, 85°C)                       | 12.32 ± 0.24                                      | 14.35 ± 0.20   |

**Table S2.** MIC of samples with different time of 10 ppm AgNPs+100 ppm Cu<sup>2+</sup> against two strains.

| Samples<br>(10 ppm Ag NPs+<br>100 ppm Cu <sup>2+</sup> ) | MIC(mg/L) against<br><i>S. aureus</i> (ATCC 6538) |                     | MIC(mg/L) against<br><i>E. coli</i> (ATCC 8099) |         |
|----------------------------------------------------------|---------------------------------------------------|---------------------|-------------------------------------------------|---------|
|                                                          | Concentration of Ag                               | Concentration of Cu | C of Ag                                         | C of Cu |
| a (Ag NPs)                                               | 7.8125                                            | --                  | 1.95                                            | --      |
| b (10 min, room temperature)                             | 0.3125                                            | 3.125               | 0.3125                                          | 3.125   |
| c (120 min, room temperature)                            | 0.3125                                            | 3.125               | 0.3125                                          | 3.125   |
| d (24 hrs, room temperature)                             | 0.3125                                            | 3.125               | 0.15625                                         | 1.5625  |
| e (48 hrs, room temperature)                             | 0.3125                                            | 3.125               | 0.15625                                         | 1.5625  |
| g (30 days, room temperature)                            | 0.15625                                           | 1.5625              | 0.15625                                         | 1.5625  |
| f (5 hrs, 85°C)                                          | 0.15625                                           | 1.5625              | 0.15625                                         | 1.5625  |
